# Supplementary material
Source: publisher figshare collection journal article supplement (https://sage.figshare.com/ndownloader/files/14032379)
Supplement: Supplementary file 1 [file 14032379]

| **Interview questions for students (phase one)** | |
| --- | --- |
|  | How do you evaluate ESP courses in your major? Are they useful? |
|  | What motivations do you have to learn technical English? |
|  | What motivations do you have for taking ESP curses? |
|  | What are your technical English needs? |
|  | How do you evaluate course content, course material? |
|  | What are your suggestions for making the course more interesting and useful? |
|  | What do you think about ESP teacher? What expectations do you have from your ESP teacher? |
| **Interview questions for students (Phase two)** | |
| 1 | What are your technical English needs? |
| 2 | What skills do you consider as challenging? |
| 3 | What skills and subskills should be included in the course? |
| 4 | Do you consider the course useful and effective? why? |
| 5 | What are your reasons and motivation for taking the course? |
| 6 | What is your idea about course content and material? |
| 7 | What factors and changes in the course do you suggest to make it more motivating? |
| 8 | What do you expect from your ESP teacher? What qualifications are necessary for an ESP teacher? |
| 9 | When is the best time for taking the course? |
| **Interview questions for ESP practitioners** | |
| 1 | What are the ESP needs of engineering students? |
| 2 | What language skills do they need to meet their needs? |
| 3 | What skills and subskills are necessary to be taught in ESP courses? |
| 4 | What is the best time for offering the course? why? |
| 5 | How do you evaluate students, motivation in ESP courses? |
| 6 | What qualifications should an ESP teacher have? |
| 7 | What strategies do you suggest to make the course more motivating? |
| 8 | What are the challenges of teaching an ESP course? |

**Appendix A**

**Students’ and Practitioners’ Interview questions**

# **Appendix B**

**Persian Translation of Students’ and ESP Practitioners’ Interview questions**

| **سوالات مصاحبه دانشجویان (فاز یک)** |
| --- |
| 1. دوره های زبان تخصصی رشته خودتان را چگونه ارزیابی می کنید؟ آیا این دوره ها مفید هستند؟ |
| 1. چه انگیزه هایی برای یادگیری زبان تخصصی فنی و مهندسی دارید؟ |
| 1. با چه انگیزه ای در دوره شرکت کرده اید؟ |
| 1. چه نیازی هایی به زبان تخصصی دارید؟ |
| 1. کتاب، جزوات و محتوای آموزشی را چگونه ارزیابی می کنید؟ |
| 1. برای جذاب تر و مفید تر شدن دوره چه پیشنهادهایی دارید؟ |
| 1. نظر شما در مورد استاد زبان تخصصی چیست ؟ چه انتظاراتی از او دارید؟ |
| **سوالات مصاحبه دانشجویان (فاز دو)** |
| 1. چه نیازی به زبان تخصصی دارید؟ |
| 1. کدام مهارت زبان تخصصی چالش شماست؟ |
| 1. در کلاس زبان تخصصی چه چیزهایی را باید آموزش بدهند؟ |
| 1. آیا کلاس مفید بود؟ چرا؟ |
| 1. با چه هدفی وارد دوره شدید؟ |
| 1. آیا از محتوای آموزشی، کتاب و مطالب آموزشی و مهارتهای تدریس شده در کلاس رضایت داشتید؟ چرا؟ |
| 1. چطور می توان انگیزه دانشجویان را در این درس افزایش داد؟ |
| 1. چه انتظاراتی از استاد زبان تخصصی دارید؟ استاد زبان تخصصی چه ویژگیهایی باید داشته باشد؟ |
| 1. چه ترمی برای ارائه این درس بهتر است؟ |
| **سوالات مصاحبه فعالان و اساتید زبان تخصصی:** |
| 1. به نظر شما دانشجویان فنی و مهندسی چه نیازهایی در زمینه زبان تخصصی دارند که در دوره زبان تخصصی باید به آنها پرداخته شود؟ |
| 1. کدام مهارت زبان تخصصی مهمترین نیاز دانشجویان مهندسی است؟ |
| 1. با توجه به اینکه درس زبان تخصصی یک درس دو واحدی است در این زمان محدود مفید ترین و کارآمد ترین مهارتی که میتوان به دانشجویان فنی آموزش داد چیست؟ |
| 1. بهترین زمان برای ارائه این درس چه زمانی است؟ چرا؟ |
| 1. انگیزه اصلی دانشجویان فنی و مهندسی از گذراندن درس زبان تخصصی چیست؟ آیا با انگیزه در کلاسها شرکت می کنند؟ |
| 1. استاد زبان تخصصی چه ویژگیهایی باید داشته باشد؟ |
| 1. چه راهکاری می تواند در دانشجویان فنی و مهندسی ایجاد انگیزه کند؟ |
| 1. مهمترین چالش شما به عنوان استاد درس زبان تخصصی چیست؟ |

**Appendix C**

**ESP Classroom Observation Checklist**

| 1 | Who teaches the course? (subject specialist or language specialist) |
| --- | --- |
| 2 | What language is used for instruction? |
| 3 | Does teacher use appropriate and predetermined lesson plan? |
| 4 | What types of material are used? |
| 5 | What language skills and subskills are focused? |
| 6 | What teaching methods are used? |
| 7 | What type of communicative activities are done? |
| 8 | What tasks and activities promote authentic language use? What types of authentic tasks are employed? |
| 9 | What is the role of technology in class? |
| 10 | What are dominant classroom interactions? |
| 11 | What types of teaching and learning activities are used? |
| 12 | How much do students participate in class? What strategies are used to promote students’ participation? |
| 13 | What amount of teacher talk and student talk occurred? |
| 14 | What is classroom atmosphere like? |

**Appendix D**

**English Questionnaire**

**Part 1: Demographic information**

1. **Sex:** male female

**3.** **University:** _________________________

**5. Major: __________________________**

**4.** **Education level.** undergraduate student graduate student

first year second year third year forth year fifth year

**5. Select one of the following about your ESP course:**

- I have already passed the course
- I am passing the course this term

| **Scales for statement-type items:**  ***1*** *(Strongly disagree)* ***2*** *(Disagree)* ***3*** *(Slightly disagree)* ***4*** *(Slightly agree)*  ***5*** *(Agree)* ***6*** *(Strongly agree)* | | *Strongly disagree* | | *Disagree* | *Slightly disagree* | | *Slightly agree* | | *Agree* | | *Strongly agree* | | |
| --- | --- | --- | --- | --- | --- | --- | --- | --- | --- | --- | --- | --- | --- |
| Q1 | I can imagine myself having a scientific discussion in English. | **1** | **2** | | | **3** | | **4** | | **5** | | **6** |
| Q2 | I can imagine myself studying in a university where all my courses are taught in English. | **1** | **2** | | | **3** | | **4** | | **5** | | **6** |
| Q3 | Whenever I think of my future career, I imagine myself using English. | **1** | **2** | | | **3** | | **4** | | **5** | | **6** |
| Q4 | I can imagine myself speaking English with international experts or colleagues. | **1** | **2** | | | **3** | | **4** | | **5** | | **6** |
| Q5 | I imagine myself as someone who is able to have a scientific talk or presentation in English in an international event. | **1** | **2** | | | **3** | | **4** | | **5** | | **6** |
| Q6 | I can imagine myself writing scientific English articles. | **1** | **2** | | | **3** | | **4** | | **5** | | **6** |
| Q7 | The things I want to do in the future require me to use technical English. | **1** | **2** | | | **3** | | **4** | | **5** | | **6** |
| Q8 | Learning technical English is important to me in order to understand the professors’ lecture in my classes. | **1** | **2** | | | **3** | | **4** | | **5** | | **6** |
| Q9 | Learning technical English is important to me in order to get better marks in my courses and improve my GPA | **1** | **2** | | | **3** | | **4** | | **5** | | **6** |
| Q10 | Learning technical English is important to me because I need it to do my homework. | **1** | **2** | | | **3** | | **4** | | **5** | | **6** |
| Q11 | Learning technical English is important to me because I need it to study my course books. | **1** | **2** | | | **3** | | **4** | | **5** | | **6** |
| Q12 | It will have a negative impact on my study if I don’t learn technical English. | **1** | **2** | | | **3** | | **4** | | **5** | | **6** |
| Q13 | Learning technical English can be important to me because I think it will someday be useful in getting a good job. | **1** | **2** | | | **3** | | **4** | | **5** | | **6** |
| Q14 | Learning technical English is important to me because with English I can work globally. | **1** | **2** | | | **3** | | **4** | | **5** | | **6** |
| Q15 | Learning technical English can be important to me because I think I’ll need it for further studies on my major. | **1** | **2** | | | **3** | | **4** | | **5** | | **6** |
| Q16 | Learning technical English is important to me because I am planning to study abroad. | **1** | **2** | | | **3** | | **4** | | **5** | | **6** |
| Q17 | Learning technical English is important in order to keep updated and informed of recent progress in my field of study. | **1** | **2** | | | **3** | | **4** | | **5** | | **6** |
| Q18 | Learning technical English is important to me in order to do well in master or PhD entrance exam. | **1** | **2** | | | **3** | | **4** | | **5** | | **6** |
| Q19 | I think class activities and my participation in the ESP class (for example presenting in English language) motivate me and affect my learning | **1** | **2** | | | **3** | | **4** | | **5** | | **6** |
| Q20 | Use of technology (slides, computer assisted learning, showing videos, etc) in the ESP course motivates me and affect my learning | **1** | **2** | | | **3** | | **4** | | **5** | | **6** |
| Q21 | I take ESP course because I like English and I enjoy learning English | **1** | **2** | | | **3** | | **4** | | **5** | | **6** |
| Q22 | I like the atmosphere of my ESP class. | **1** | **2** | | | **3** | | **4** | | **5** | | **6** |
| Q23 | I think the instructor used a useful and practical lesson plan | **1** | **2** | | | **3** | | **4** | | **5** | | **6** |
| Q24 | The topics presented in the class encouraged me to participate actively. | **1** | **2** | | | **3** | | **4** | | **5** | | **6** |
| Q25 | I think the topic covered in the course were rudimentary and boring | **1** | **2** | | | **3** | | **4** | | **5** | | **6** |
| Q26 | I like the method used by the ESP instructor to teach technical English. | **1** | **2** | | | **3** | | **4** | | **5** | | **6** |
| Q27 | I think the material used in the class was useful and it includes appropriate topics | **1** | **2** | | | **3** | | **4** | | **5** | | **6** |
| Q28 | I think the material used in the class was boring | **1** | **2** | | | **3** | | **4** | | **5** | | **6** |

# **Appendix E**

**Persian Translation of Questionnaire**

بخش اول: اطلاعات شخصی

جنسیت: زن مرد

دانشگاه محل تحصیل: _____________________

رشته تحصیلی: ______________________

دوره آموزشی: کارشناسی کارشناسی ارشد

سال تحصیلی: سال اول سال دوم سال سوم سال چهارم سال پنجم

یکی از گزینه های زیر را در مورد درس زبان تخصصی انتخاب کنید:

- درس زبان تخصصی را قبلا گذرانده ام.
- در حال گذراندن درس زبان تخصصی در ترم جاری هستم.

| در این قسمت با کشیدن دایره دور اعداد ١ تا ۶ میزان موافقت یا مخالفت خود را با عبارتهای زیرمشخص نمایید. لطفا به تمام گزینه ها پاسخ دهید. | | کاملا مخالفم | مخالفم | تا حدودی مخالفم | تا حدودی موافقم | موافقم | کاملا موافقم |
| --- | --- | --- | --- | --- | --- | --- | --- |
| Q1 | خودم را در آینده در حال شرکت در مباحث علمی به زبان انگلیسی تصور می کنم. | ١ | ٢ | ٣ | ٤ | ٥ | ۶ |
| Q2 | خودم را در آینده در حال درس خواندن در یک دانشگاه که در آن همه درس ها به زبان انگلیسی ارائه می شود تصور می کنم. | ١ | ٢ | ٣ | ٤ | ٥ | ۶ |
| Q3 | هر گاه به آینده شغلی خودم فکر می کنم خودم را در حال استفاده از زبان انگلیسی تصور می کنم. | ١ | ٢ | ٣ | ٤ | ٥ | ۶ |
| Q4 | خودم را در آینده در حال مکالمه به زبان انگلیسی با متخصصان بین المللی و همکارانم تصور می کنم. | ١ | ٢ | ٣ | ٤ | ٥ | ۶ |
| Q5 | خودم را شخصی تصور می کنم که می تواند در یک رویداد بین المللی سخنرانی یا ارائه علمی به زبان انگلیسی داشته باشد. | ١ | ٢ | ٣ | ٤ | ٥ | ۶ |
| Q6 | خودم را در آینده در حال نوشتن مقالات علمی به زبان انگلیسی تصور می کنم. | ١ | ٢ | ٣ | ٤ | ٥ | ۶ |
| Q7 | برای آنچه در آینده می خواهم انجام دهم نیاز به استفاده از زبان تخصصی دارم. | ١ | ٢ | ٣ | ٤ | ٥ | ۶ |
| Q8 | یادگیری زبان تخصصی برای فهم صحبتهای اساتید در کلاسهای درس من اهمیت دارد. | ١ | ٢ | ٣ | ٤ | ٥ | ۶ |
| Q9 | یادگیری زبان تخصصی برای اخذ نمرات بهتر در درسهای من و بالا بردن معدل من اهمیت دارد. | ١ | ٢ | ٣ | ٤ | ٥ | ۶ |
| Q10 | یادگیری زبان تخصصی برای من اهمیت دارد زیرا برای انجام تکالیفم به آن نیاز دارم. | ١ | ٢ | ٣ | ٤ | ٥ | ۶ |
| Q11 | یادگیری زبان تخصصی برای من اهمیت دارد زیرا برای خواندن منابع درسی خود به آن نیاز دارم. | ١ | ٢ | ٣ | ٤ | ٥ | ۶ |
| Q12 | اگر زبان تخصصی را نیاموزم در درسهای من اثر منفی خواهد داشت. | ١ | ٢ | ٣ | ٤ | ٥ | ۶ |
| Q13 | یادگیری زبان تخصصی برای من اهمیت دارد زیرا می تواند در استخدام من در یک شغل خوب در آینده سودمند باشد. | ١ | ٢ | ٣ | ٤ | ٥ | ۶ |
| Q14 | یادگیری زبان تخصصی برای من اهمیت دارد زیرا با آن می توانم در سطح بین المللی کار کنم. | ١ | ٢ | ٣ | ٤ | ٥ | ۶ |
| Q15 | یادگیری زبان تخصصی برای من اهمیت دارد زیرا فکر می کنم برای ادامه تحصیل در رشته خودم به آن نیاز دارم. | ١ | ٢ | ٣ | ٤ | ٥ | ۶ |
| Q16 | یادگیری زبان تخصصی برای من اهمیت دراد زیرا می خواهم برای ادامه تحصیل به خارج بروم. | ١ | ٢ | ٣ | ٤ | ٥ | ۶ |
| Q17 | یادگیری زبان تخصصی برای بروز بودن و مطلع بودن از پیشرفتهای اخیر در رشته من اهمیت دارد. | ١ | ٢ | ٣ | ٤ | ٥ | ۶ |
| Q18 | یادگیری زبان تخصصی برای به دست آوردن نتیجه خوب در آزمون ورودی کارشناسی ارشد و دکتری اهمیت دارد. | ١ | ٢ | ٣ | ٤ | ٥ | ۶ |
| Q19 | فکر می کنم فعالیت کلاسی و مشارکت من در کلاس درس زبان تخصصی (برای مثال ارائه به زبان انگلیسی) در من ایجاد انگیزه می نماید و در یادگیری من مؤثر است. | ١ | ٢ | ٣ | ٤ | ٥ | ۶ |
| Q20 | استفاده از تکنولوژی (نظیر اسلاید، آموزش با استفاده از کامپیوتر، پخش ویدئوهای آموزشی و ...) در کلاس زبان تخصصی در من ایجاد انگیزه می نماید و در یادگیری من مؤثر است. | ١ | ٢ | ٣ | ٤ | ٥ | ۶ |
| Q21 | من درس زبان تخصصی را به این دلیل انتخاب کردم که در کل به زبان انگلیسی و یادگیری آن علاقمندم | ١ | ٢ | ٣ | ٤ | ٥ | ۶ |
| Q22 | من به جو کلاس زبان تخصصی علاقمندم. | ١ | ٢ | ٣ | ٤ | ٥ | ۶ |
| Q23 | فکر می کنم برنامه درسی استاد مفید و کاربردی است. | ١ | ٢ | ٣ | ٤ | ٥ | ۶ |
| Q24 | مطالب ارائه شده در کلاس من را به شرکت فعال در کلاس ترغیب می کند. | ١ | ٢ | ٣ | ٤ | ٥ | ۶ |
| Q25 | فکر میکنم مطالب آموزشی درس زبان تخصصی سطحی و کسل کننده بود. | ١ | ٢ | ٣ | ٤ | ٥ | ۶ |
| Q26 | من روش تدریس استاد زبان تخصصی خود را برای آموزش زبان تخصصی می پسندم. | ١ | ٢ | ٣ | ٤ | ٥ | ۶ |
| Q27 | فکر می کنم منابع درسی مورد استفاده در درس زبان تخصصی کارآمد است و حاوی مطالب مناسبی است. | ١ | ٢ | ٣ | ٤ | ٥ | ۶ |
| Q28 | فکر می کنم منابع درسی در کلاس زبان تخصصی جذابیتی ندارد. | ١ | ٢ | ٣ | ٤ | ٥ | ۶ |
